# Supplementary material for: Effect of oxygen storage materials on the performance of Pt-based three-way catalysts
Source: Royal Society of Chemistry journal article supplement (doi:10.1039/d2cy00469k), 2022-01-01
Supplement: d2cy00469k1.pdf [file d2cy00469k1.pdf]

## Supporting Information

# Effect of Oxygen Storage Materials on the Performance of Pt-based Three-Way Catalysts

Gang Wang,<sup>†</sup> Yuan Jing,<sup>†</sup> Kah Wei Ting,<sup>†</sup> Zen Maeno,<sup>†</sup> Xiaorui Zhang,<sup>§</sup> Shuhei Nagaoka,<sup>\*§</sup>  
Ken-ichi Shimizu<sup>†,‡</sup>, and Takashi Toyao<sup>\*†,‡</sup>

<sup>†</sup> Institute for Catalysis, Hokkaido University, N-21, W-10, Sapporo 001-0021, Japan

<sup>§</sup> Johnson Matthey Japan G.K., 5123-3, Kitsuregawa, Sakura, Tochigi 329-1412, Japan

<sup>‡</sup> Elements Strategy Initiative for Catalysts and Batteries, Kyoto University, Katsura, Kyoto 615-8520, Japan

\*Corresponding authors:

Takashi Toyao and Shuhei Nagaoka

E-mail: toyao@cat.hokudai.ac.jp; Shuhei.Nagaoka@mattheyasia.com

## Supplementary Results

Table S1. Composition of the simulated exhaust gas mixtures for light-off tests.

| $\lambda$ | CO /% | C <sub>3</sub> H <sub>6</sub> /ppm | H <sub>2</sub> /% | NO /ppm | O <sub>2</sub> /% | CO <sub>2</sub> /% | H <sub>2</sub> O /% | N <sub>2</sub> |
|-----------|-------|------------------------------------|-------------------|---------|-------------------|--------------------|---------------------|----------------|
| 0.95      | 2.40  | 420                                | 0.80              | 1000    | 0.60              | 15                 | 10                  | balance        |
| 1.00      | 0.60  | 420                                | 0.20              | 1000    | 0.60              | 15                 | 10                  | balance        |
| 1.05      | 0.60  | 420                                | 0.20              | 1000    | 1.65              | 15                 | 10                  | balance        |

Table S2. Composition of the simulated exhaust gas mixtures for  $\lambda$  sweep tests.

| $\lambda$ | CO /% | C <sub>3</sub> H <sub>6</sub> /ppm | H <sub>2</sub> /% | NO /ppm | O <sub>2</sub> /% | CO <sub>2</sub> /% | H <sub>2</sub> O /% | N <sub>2</sub> |
|-----------|-------|------------------------------------|-------------------|---------|-------------------|--------------------|---------------------|----------------|
| 0.95      | 2.11  | 420                                | 0.70              | 500     | 0.50              | 14                 | 10                  | balance        |
| 0.96      | 1.76  | 420                                | 0.59              | 500     | 0.50              | 14                 | 10                  | balance        |
| 0.97      | 1.40  | 420                                | 0.49              | 500     | 0.50              | 14                 | 10                  | balance        |
| 0.98      | 1.07  | 420                                | 0.38              | 500     | 0.50              | 14                 | 10                  | balance        |
| 0.99      | 0.78  | 420                                | 0.28              | 500     | 0.50              | 14                 | 10                  | balance        |
| 1.00      | 0.50  | 420                                | 0.17              | 500     | 0.50              | 14                 | 10                  | balance        |
| 1.01      | 0.50  | 420                                | 0.17              | 500     | 0.72              | 14                 | 10                  | balance        |
| 1.02      | 0.50  | 420                                | 0.17              | 500     | 0.92              | 14                 | 10                  | balance        |
| 1.03      | 0.50  | 420                                | 0.17              | 500     | 1.10              | 14                 | 10                  | balance        |
| 1.04      | 0.50  | 420                                | 0.17              | 500     | 1.30              | 14                 | 10                  | balance        |
| 1.05      | 0.50  | 420                                | 0.17              | 500     | 1.54              | 14                 | 10                  | balance        |

Table S3. Composition of the simulated exhaust gas mixtures for  $\lambda$  switching tests.

| $\lambda$ | CO /% | C <sub>3</sub> H <sub>6</sub> /ppm | H <sub>2</sub> /% | NO /ppm | O <sub>2</sub> /% | CO <sub>2</sub> /% | H <sub>2</sub> O /% | N <sub>2</sub> |
|-----------|-------|------------------------------------|-------------------|---------|-------------------|--------------------|---------------------|----------------|
| 0.95      | 2.40  | 420                                | 0.80              | 1000    | 0.60              | 15                 | 10                  | balance        |
| 1.05      | 0.60  | 420                                | 0.20              | 1000    | 1.65              | 15                 | 10                  | balance        |

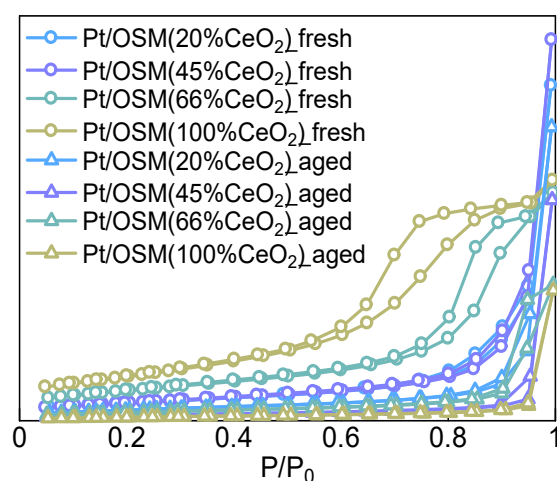

Figure S1. Isothermal N<sub>2</sub> adsorption and desorption curves of fresh and aged Pt/OSMs having different ceria content.

Table S4. Textual properties of Pt/OSMs having different ceria content.

| Catalyst                            | S <sub>BET</sub> <sup>a</sup> /m <sup>2</sup> g <sup>-1</sup> | Pt particle size <sup>b</sup> /nm | Pt particle size <sup>c</sup> /nm |
|-------------------------------------|---------------------------------------------------------------|-----------------------------------|-----------------------------------|
| Pt/OSM(20%CeO <sub>2</sub> )_fresh  | 58                                                            | 4.0                               | 3.0                               |
| Pt/OSM(45%CeO <sub>2</sub> )_fresh  | 57                                                            | 3.9                               | 2.8                               |
| Pt/OSM(66%CeO <sub>2</sub> )_fresh  | 99                                                            | 3.2                               | 2.2                               |
| Pt/OSM(100%CeO <sub>2</sub> )_fresh | 146                                                           | 2.3                               | 2.1                               |
| Pt/OSM(20%CeO <sub>2</sub> )_aged   | 36                                                            | -                                 | 8.9                               |
| Pt/OSM(45%CeO <sub>2</sub> )_aged   | 18                                                            | -                                 | 9.0                               |
| Pt/OSM(66%CeO <sub>2</sub> )_aged   | 27                                                            | -                                 | 8.7                               |
| Pt/OSM(100%CeO <sub>2</sub> )_aged  | 12                                                            | -                                 | 9.2                               |

<sup>a</sup> Determined by N<sub>2</sub> adsorption, <sup>b</sup> Estimated by CO adsorption at -70 °C, <sup>c</sup> Estimated by HAADF-STEM

Fresh catalysts

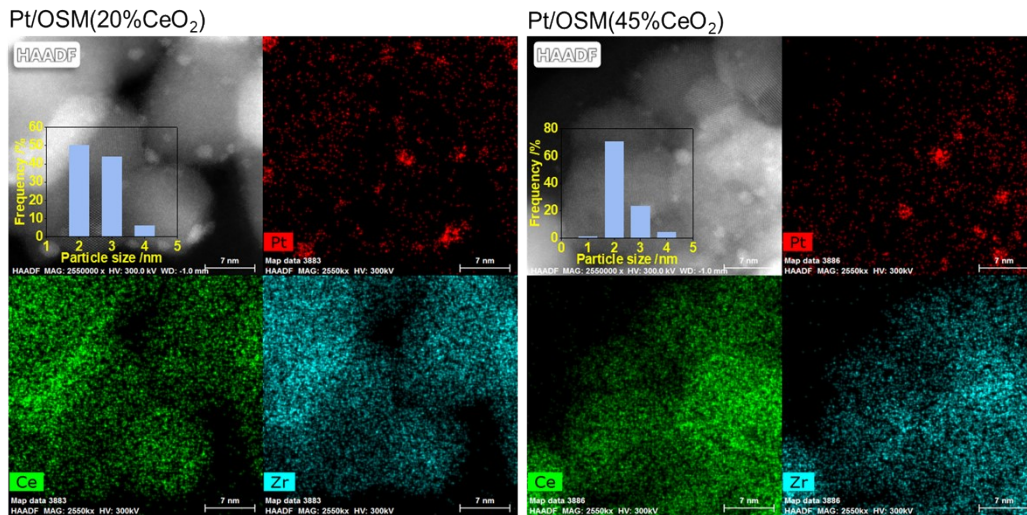

Pt/OSM(100%CeO<sub>2</sub>)

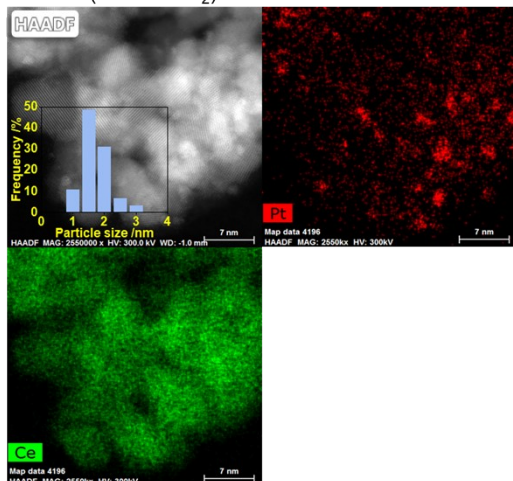

After aging treatment

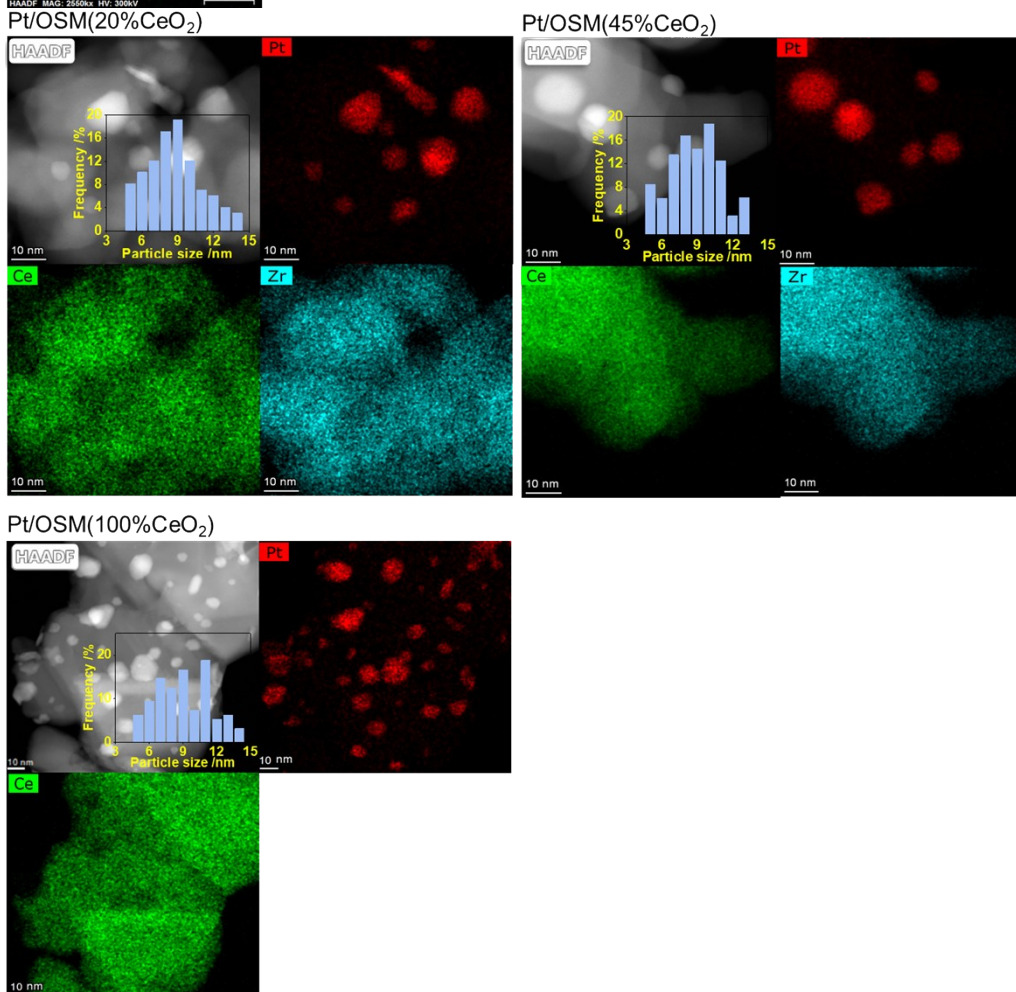

Figure S2. HAADF-STEM images and EDS elemental maps of fresh and aged Pt/OSMs having different ceria content.

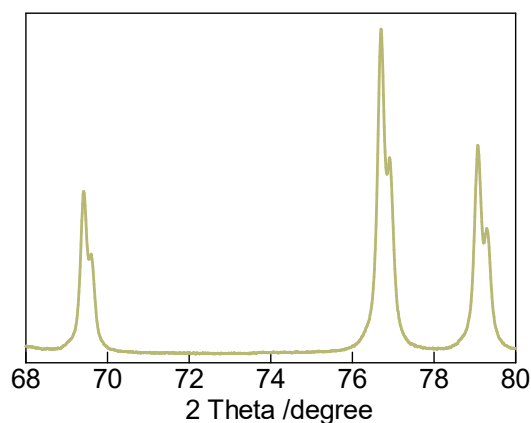

Figure S3. Close-up of XRD pattern of aged Pt/OSM(100%CeO<sub>2</sub>) for the peak splitting.

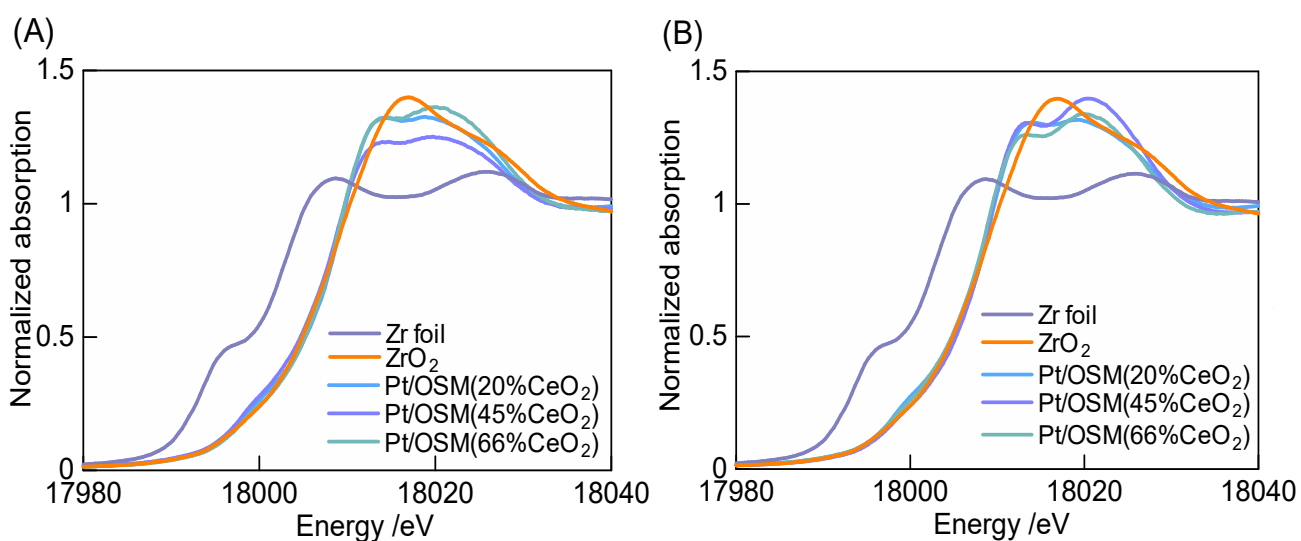

Figure S4. Zr K-edge XANES spectra of (A) fresh and (B) aged Pt/OSMs (27.1 mg for Pt/OSM(20%CeO<sub>2</sub>), 44.7 mg for Pt/OSM(45%CeO<sub>2</sub>), and 82.0 mg for Pt/OSM(66%CeO<sub>2</sub>)) having different ceria content.

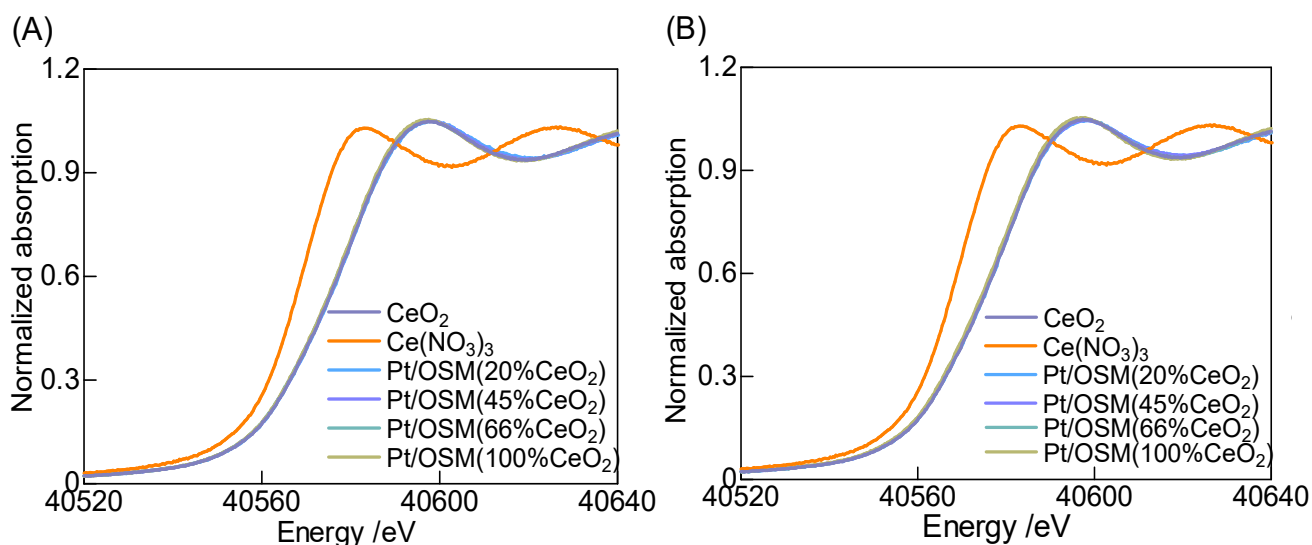

Figure S5. Ce K-edge XANES spectra of (A) fresh and (B) aged Pt/OSMs (110 mg for Pt/OSM(20%CeO<sub>2</sub>), 47.0 mg for Pt/OSM(45%CeO<sub>2</sub>), 33.0 mg for Pt/OSM(66%CeO<sub>2</sub>), and 22.0 mg for Pt/OSM(100%CeO<sub>2</sub>)) having different ceria content.

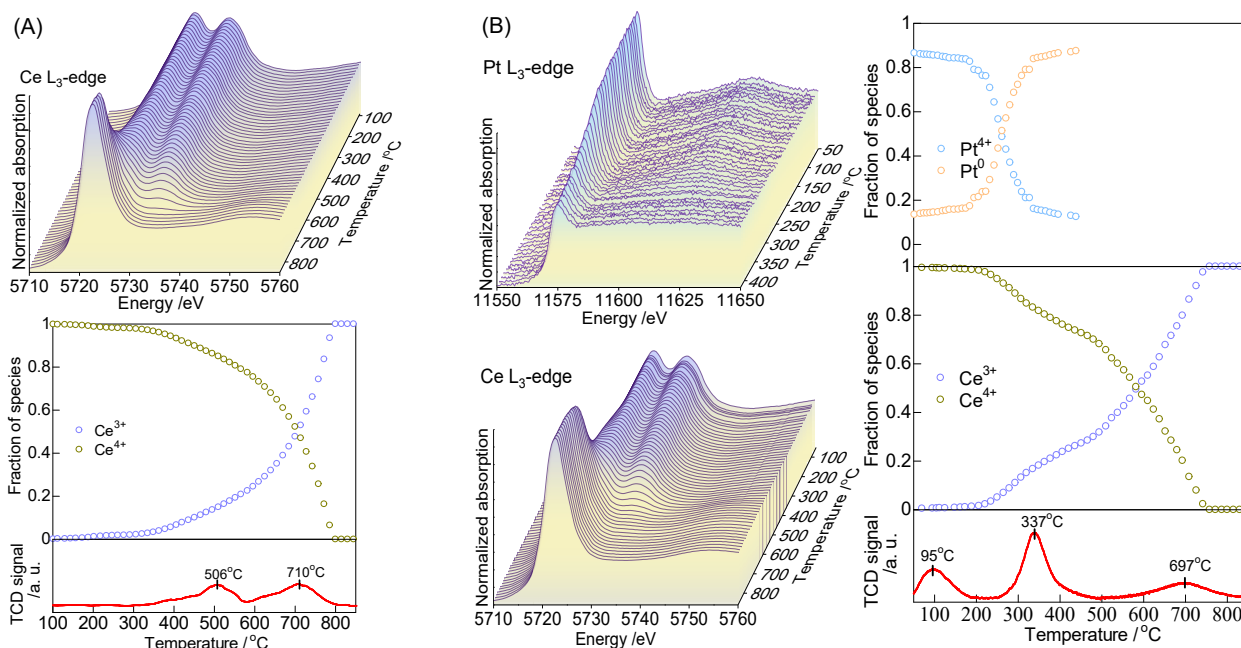

Figure S6. *In situ* Ce and Pt L<sub>3</sub>-edge XAS during H<sub>2</sub>-TPR of (A) OSM(100%CeO<sub>2</sub>) (1.3 mg sample mixed with 20.4 mg BN) and (B) PtO<sub>2</sub>/OSM(100%CeO<sub>2</sub>) (Sample weight = 1.3 mg with 20.4 mg of BN for Ce L<sub>3</sub>-edge and 17.3 mg with 12.8 mg of BN for Pt L<sub>3</sub>-edge examination) conducted under H<sub>2</sub> flow (1000 mL/min) at the heating rate of 15 °C/min using CeO<sub>2</sub> and Ce(NO<sub>3</sub>)<sub>3</sub>, and Pt foil and PtO<sub>2</sub> as references for linear combination fitting analysis.

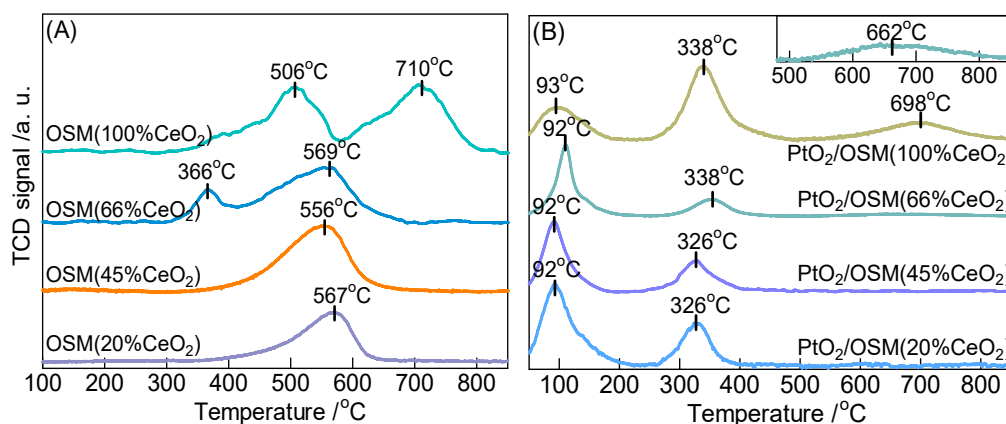

Figure S7. H<sub>2</sub>-TPR profiles of (A) OSM supports and (B) PtO<sub>2</sub>/OSMs having different ceria content.

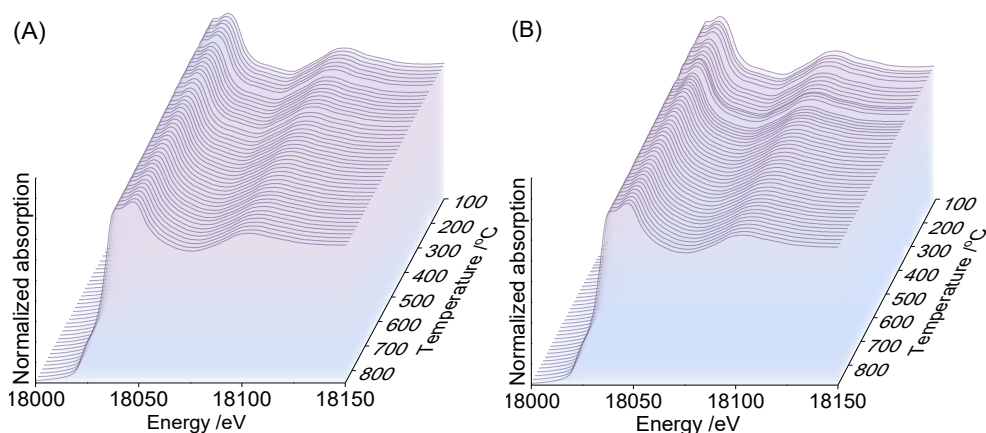

Figure S8. *In situ* Zr K-edge XANES spectra recorded during H<sub>2</sub>-TPR of (A) OSM(66%CeO<sub>2</sub>) (Sample weight = 18.7 mg with 12.8 mg of BN) and (B) PtO<sub>2</sub>/OSM(66%CeO<sub>2</sub>) (Sample weight = 19.3 mg sample with 12.8 mg of BN) conducted under H<sub>2</sub> flow (1000 mL/min) using Zr foil and ZrO<sub>2</sub> as reference.



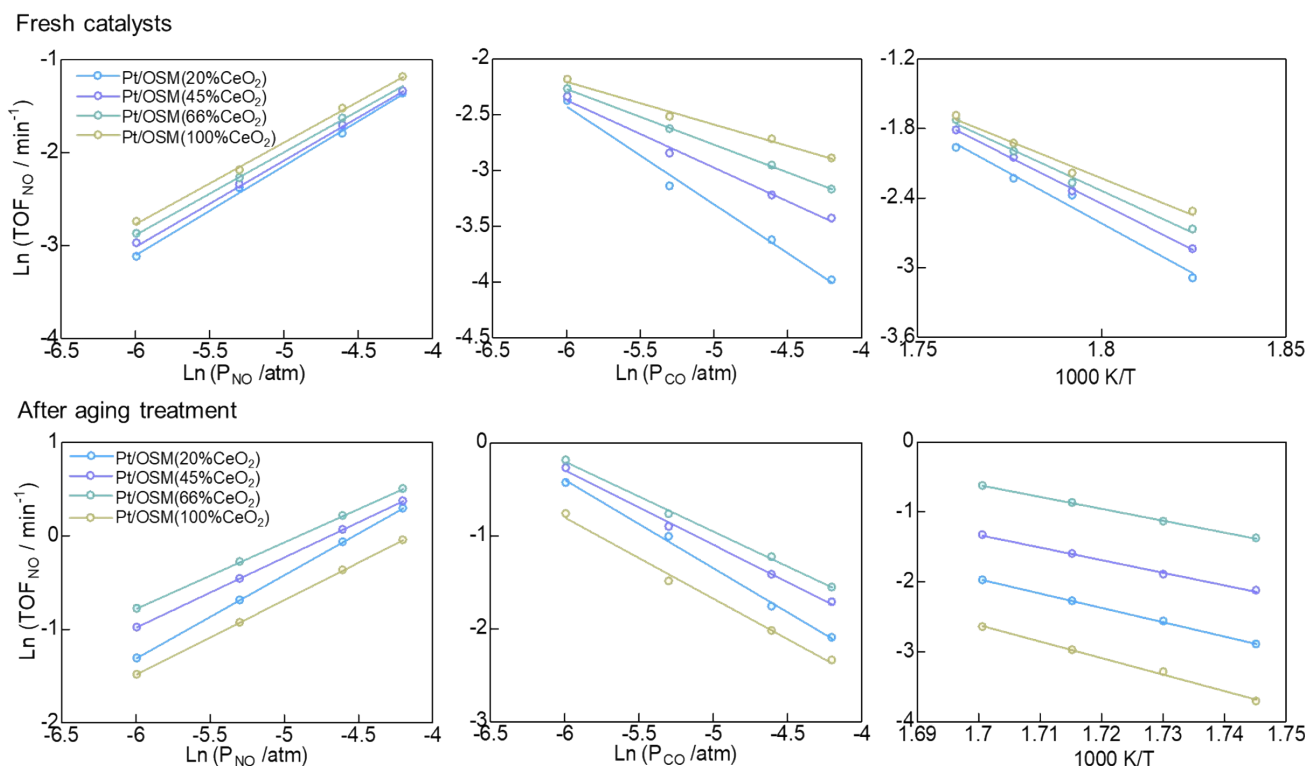

Figure S9. Apparent kinetic studies on NO–CO reactions over fresh and aged powdered Pt/OSMs (20 mg) having different ceria content at the reaction condition of 0.25–1.5% NO (0.5% for Arrhenius plot test), 0.5–2.0% CO (0.5% for Arrhenius plot test) in He flow (80 mL/min), 285 °C and 320 °C for reaction order measurement on fresh and aged catalysts, while 275–295 °C and 300–315 °C for Arrhenius plot examination on corresponding samples.

Table S5. Kinetic informatics of reaction order and activation barrier.

| Catalyst                            | Reaction order of NO | Reaction order of CO | Activation barrier (kJ mol <sup>-1</sup> ) |
|-------------------------------------|----------------------|----------------------|--------------------------------------------|
| Pt/OSM(20%CeO <sub>2</sub> )_fresh  | 0.96                 | -1.15                | 144                                        |
| Pt/OSM(45%CeO <sub>2</sub> )_fresh  | 0.91                 | -0.75                | 133                                        |
| Pt/OSM(66%CeO <sub>2</sub> )_fresh  | 0.89                 | -0.65                | 121                                        |
| Pt/OSM(100%CeO <sub>2</sub> )_fresh | 0.87                 | -0.50                | 106                                        |
| Pt/OSM(20%CeO <sub>2</sub> )_aged   | 1.37                 | -1.88                | 170                                        |
| Pt/OSM(45%CeO <sub>2</sub> )_aged   | 1.15                 | -1.60                | 150                                        |
| Pt/OSM(66%CeO <sub>2</sub> )_aged   | 1.07                 | -1.50                | 141                                        |
| Pt/OSM(100%CeO <sub>2</sub> )_aged  | 1.21                 | -1.70                | 193                                        |

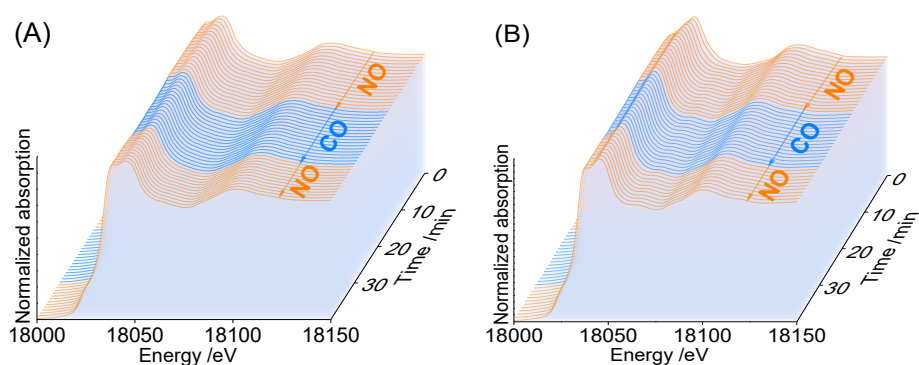

Figure S10. *In situ* Zr K-edge XAS measurements during NO–CO reactions on (A) fresh and (B) aged Pt/OSM(66%CeO<sub>2</sub>) (Sample weight = 19.3 mg with 12.8 mg of BN) in a switched flow of 0.5% NO/He and 0.5% CO/He (1000 mL/min) at 200 °C after H<sub>2</sub> reduction at 400 °C, using Zr foil and ZrO<sub>2</sub> as references.

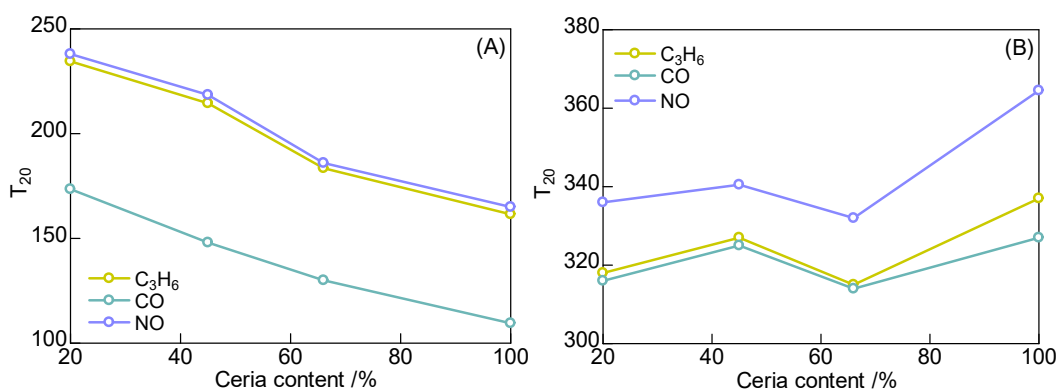

Figure S11. Effect of ceria content on  $T_{20}$  behavior over (A) fresh and (B) aged Pt/OSMs having different ceria content for the TWC light-off performance tests over fresh and aged Pt/OSM-coated honeycomb catalysts (Figure 9) under a switched flow of CO (2.4-0.6%), C<sub>3</sub>H<sub>6</sub> (420 ppm), H<sub>2</sub> (0.8-0.2%), NO (1000 ppm), O<sub>2</sub> (0.6-1.65%), CO<sub>2</sub> (15%), and H<sub>2</sub>O (10%) (with the balance being composed of N<sub>2</sub>) with the lambda perturbation set at 1 Hz changing from 0.95 (rich) to 1.05 (lean) at a heating rate of 25 °C/min and SV = 100,000 h<sup>-1</sup>.

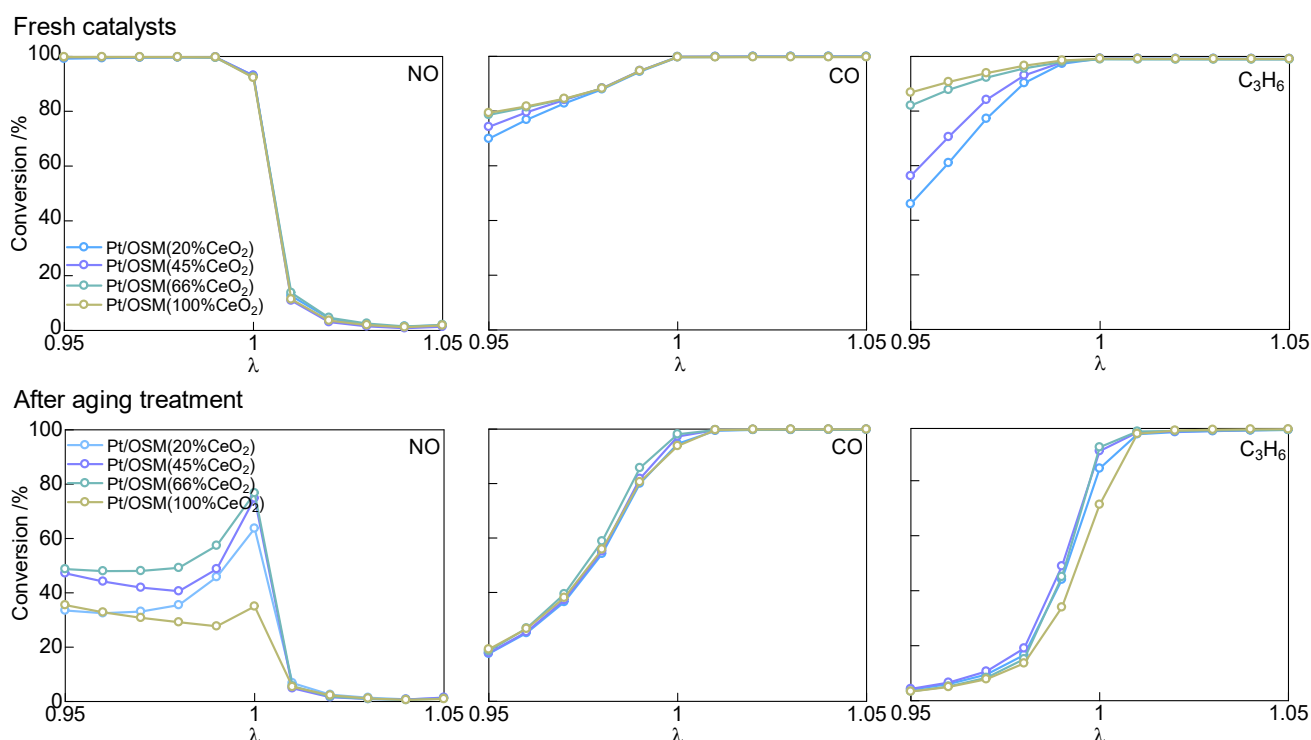

Figure S12. Effect of OSMs on TWC lambda-sweep performance over fresh and aged Pt/OSM-coated honeycomb catalysts under a switched flow of CO (2.4-0.6%), C<sub>3</sub>H<sub>6</sub> (420 ppm), H<sub>2</sub> (0.8-0.2%), NO (1000 ppm), O<sub>2</sub> (0.6-1.65%), CO<sub>2</sub> (15%), and H<sub>2</sub>O (10%) (with the balance being composed of N<sub>2</sub>) with the lambda perturbation interval set at 60 s and changing from 0.95 (rich) to 1.05 (lean) through steps of 0.01 at 400 °C and SV = 100,000 h<sup>-1</sup>.

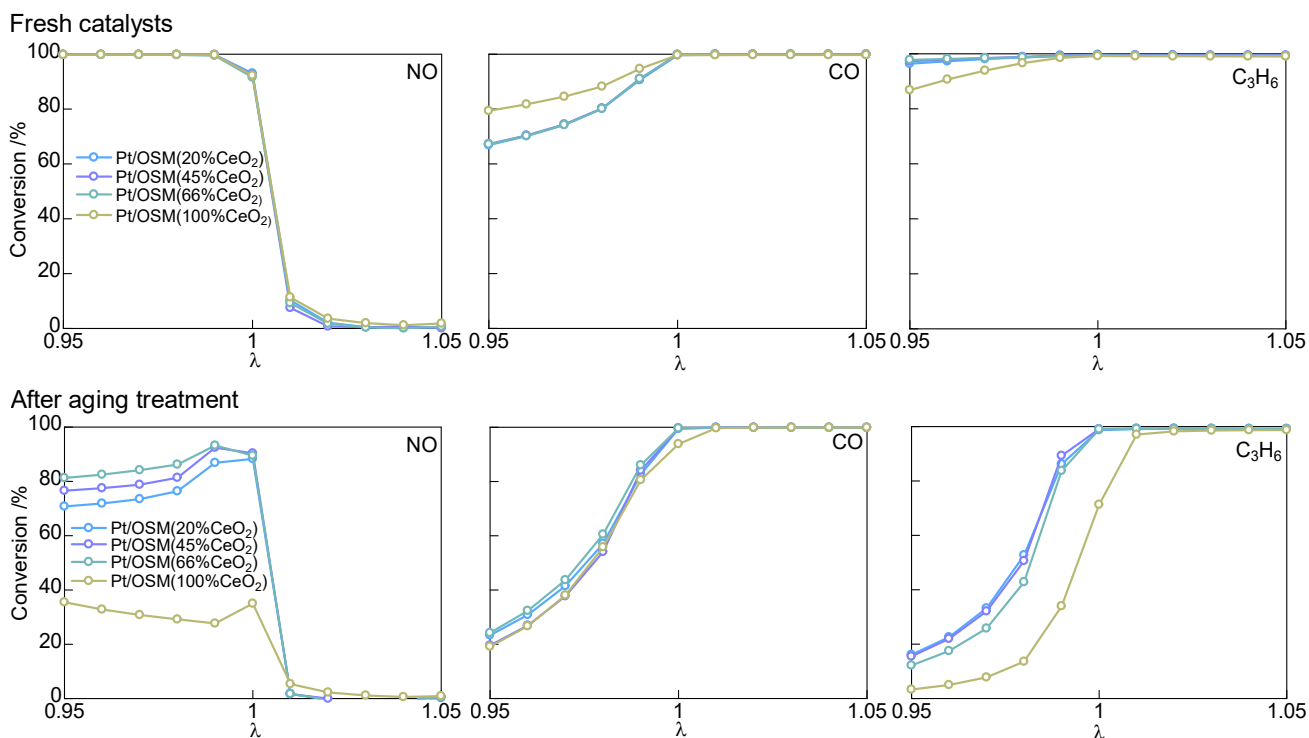

Figure S13. Effect of OSMs on TWC lambda-sweep performance over fresh and aged Pt/OSM-coated honeycomb catalysts under a switched flow of CO (2.4-0.6%), C<sub>3</sub>H<sub>6</sub> (420 ppm), H<sub>2</sub> (0.8-0.2%), NO (1000 ppm), O<sub>2</sub> (0.6-1.65%), CO<sub>2</sub> (15%), and H<sub>2</sub>O (10%) (with the balance being composed of N<sub>2</sub>) with the lambda perturbation interval set at 60 s and changing from 0.95 (rich) to 1.05 (lean) through steps of 0.01 at 500 °C and SV = 100,000 h<sup>-1</sup>.
